# Supplementary material for: Effect of Birth Preparedness on Institutional Delivery in Semiurban Ethiopia: A Cross-Sectional Study
Source: PubMed Central journal article supplement (PMC6634364; doi:10.5334/aogh.920), 2019-03-21
Supplement: agh-85-1-920-s1.pdf [file agh-85-1-920-s1.pdf]

**Supplemental Table 1. Definitions of Birth Preparedness in Previous Studies**

| Citation                                                                                                                                                                                                                                                                     | Items Included in Index/Scale                                                                                                                                                                                                                                                                    | Definition of Birth Preparedness                                                                                                                  |
|------------------------------------------------------------------------------------------------------------------------------------------------------------------------------------------------------------------------------------------------------------------------------|--------------------------------------------------------------------------------------------------------------------------------------------------------------------------------------------------------------------------------------------------------------------------------------------------|---------------------------------------------------------------------------------------------------------------------------------------------------|
| Hiluf M, Fantahun M. Birth Preparedness and Complication Readiness among women in Adigrat town, north Ethiopia. <i>Ethiop J Heal Dev.</i> 2008;22(1):14-20.                                                                                                                  | <ul style="list-style-type: none"> <li>• Identified a place of delivery</li> <li>• Saved money</li> <li>• Identified a means of transport to a place of childbirth or for the time of obstetric emergencies ahead of childbirth</li> </ul>                                                       | <ul style="list-style-type: none"> <li>• Reported all three items (100%)</li> </ul>                                                               |
| Agarwal S, Sethi V, Srivastava K, Jha PK, Baqui AH. Birth preparedness and complication readiness among slum women in Indore city, India. <i>Journal of health, population, and nutrition.</i> 2010;28(4):383-391.                                                           | <ul style="list-style-type: none"> <li>• Identified trained birth attendant</li> <li>• Saved money</li> <li>• Identified transport</li> <li>• Identified health facility</li> </ul>                                                                                                              | <ul style="list-style-type: none"> <li>• Reported ≥3 out of 4 items (75%)</li> </ul>                                                              |
| Hailu M, Gebremariam A, Alemseged F, Deribe K. Birth preparedness and complication readiness among pregnant women in Southern Ethiopia. <i>PLoS One.</i> 2011;6(6). doi:10.1371/journal.pone.0021432.                                                                        | <ul style="list-style-type: none"> <li>• Arranged for transportation</li> <li>• Saved money for delivery</li> <li>• Identified skilled attendant to assist at birth</li> <li>• Identified a health facility for emergency</li> <li>• Identified blood donor in case of emergency.</li> </ul>     | <ul style="list-style-type: none"> <li>• Reported ≥2 out of 5 items (40%)</li> </ul>                                                              |
| Kabakyenga JK, Östergren PO, Turyakira E, Pettersson KO. Influence of birth preparedness, decision-making on location of birth and assistance by skilled birth attendants among women in South-Western Uganda. <i>PLoS One.</i> 2012;7(4). doi:10.1371/journal.pone.0035747. | <ul style="list-style-type: none"> <li>• Identified skilled health professional</li> <li>• Saved money</li> <li>• Identified transport</li> <li>• Had delivery kit/materials.</li> </ul>                                                                                                         | <ul style="list-style-type: none"> <li>• Reported ≥3 of 4 items (75%)</li> </ul>                                                                  |
| Nawal D, Goli S. Birth Preparedness and Its Effect on Place of Delivery and Post-Natal Check-Ups in Nepal. <i>PLoS One.</i> 2013;8(5). doi:10.1371/journal.pone.0060957.                                                                                                     | <ul style="list-style-type: none"> <li>• Saved money</li> <li>• Arranged for transport</li> <li>• Identified blood donor</li> <li>• Identified health worker</li> <li>• Prepared delivery kit</li> <li>• Prepared food</li> <li>• Prepared clothes</li> <li>• Made other preparations</li> </ul> | <ul style="list-style-type: none"> <li>• Used PCA to create scale with four categories: no preparations, poor, moderate, well prepared</li> </ul> |
| Debelew GT, Afework MF, Yalew AW. Factors affecting birth preparedness and complication readiness in Jimma Zone, Southwest Ethiopia: a                                                                                                                                       | <ul style="list-style-type: none"> <li>• Plan where to give birth in a health facility</li> <li>• Plan for skilled birth attendant</li> <li>• Plan to save money</li> </ul>                                                                                                                      | <ul style="list-style-type: none"> <li>• Reported ≥3 of 5 items (60%)</li> </ul>                                                                  |

|                                                                                                                                                                                                                                                             |                                                                                                                                                                                                                                                                                                                                                                                                                                                                         |                                                                                                      |
|-------------------------------------------------------------------------------------------------------------------------------------------------------------------------------------------------------------------------------------------------------------|-------------------------------------------------------------------------------------------------------------------------------------------------------------------------------------------------------------------------------------------------------------------------------------------------------------------------------------------------------------------------------------------------------------------------------------------------------------------------|------------------------------------------------------------------------------------------------------|
| <p>multilevel analysis. <i>Pan Afr Med J.</i> 2014;19:1-14. doi:10.11604/pamj.2014.19.272.4244.</p>                                                                                                                                                         | <ul style="list-style-type: none"> <li>• Plan for transportation</li> <li>• Identification of compatible blood donors in case of emergency</li> </ul>                                                                                                                                                                                                                                                                                                                   |                                                                                                      |
| <p>Markos D, Bogale D. Birth preparedness and complication readiness among women of child bearing age group in Goba woreda, Oromia region, Ethiopia. <i>BMC Pregnancy Childbirth.</i> 2014;14(1):282. doi:10.1186/1471-2393-14-282.</p>                     | <ul style="list-style-type: none"> <li>• Identified place of delivery</li> <li>• Planned for a skilled assistant during delivery</li> <li>• Saved money for obstetric emergency</li> <li>• Planned of mode of transport to place of delivery during emergency</li> <li>• Planned for a blood donor during obstetric emergency</li> <li>• Detected early signs of emergency</li> <li>• Identifying institution with 24 hour emergency obstetric care services</li> </ul> | <ul style="list-style-type: none"> <li>• Reported <math>\geq 4</math> of 7 items (57%)</li> </ul>    |
| <p>Kaso M, Addisse M. Birth preparedness and complication readiness in Robe Woreda, Arsi Zone, Oromia Region, Central Ethiopia: a cross-sectional study. <i>Reprod Health.</i> 2014;11(1):55. doi:10.1186/1742-4755-11-55.</p>                              | <ul style="list-style-type: none"> <li>• Identified place of delivery</li> <li>• Saved money</li> <li>• Identify skilled provider at birth</li> <li>• Identified a means of transport to place of childbirth or for the time of obstetric emergencies ahead of childbirth</li> </ul>                                                                                                                                                                                    | <ul style="list-style-type: none"> <li>• Reported <math>\geq 3</math> of 4 items (75%)</li> </ul>    |
| <p>Tura G, Afework M, Yalew A. The effect of birth preparedness and complication readiness on skilled care use: a prospective follow-up study in Southwest Ethiopia. <i>Reprod Health.</i> 2014;11(1):60. doi:10.1186/1742-4755-11-60.</p>                  | <ul style="list-style-type: none"> <li>• Planned to save money</li> <li>• Planned to arrange transport</li> <li>• Planned to give birth in health facility</li> <li>• Planned to be attended by skilled attendant</li> <li>• Planned to arrange blood donor</li> </ul>                                                                                                                                                                                                  | <ul style="list-style-type: none"> <li>• Reported <math>\geq 3</math> of 5 criteria (60%)</li> </ul> |
| <p>Bintabara D, Mohamed MA, Mghamba J, Wasswa P, Mpembeni RNM. Birth preparedness and complication readiness among recently delivered women in chamwino district, central Tanzania: a cross sectional study. <i>Reproductive Health.</i> 2015;12(1):44.</p> | <ul style="list-style-type: none"> <li>• Knew the expected date of delivery (EDD)</li> <li>• Identified a skilled birth attendant or health facility for delivery/emergency</li> <li>• Identified mode of transport for delivery and obstetric emergency</li> <li>• Saved money</li> <li>• Identified two compatible blood donors</li> </ul>                                                                                                                            | <ul style="list-style-type: none"> <li>• Reported <math>\geq 3</math> of 5 items (60%)</li> </ul>    |
| <p>Wilunda C, Quaglio G, Putoto G, et al. Determinants of utilisation of antenatal care and</p>                                                                                                                                                             | <ul style="list-style-type: none"> <li>• Identified transport,</li> <li>• Saved money</li> </ul>                                                                                                                                                                                                                                                                                                                                                                        | <ul style="list-style-type: none"> <li>• Reported <math>\geq 2</math> of 5 items (40%)</li> </ul>    |

|                                                                                                                                                                                                                                                                              |                                                                                                                                                                                                                                                                                                                                                                               |                                                                                                                                                                           |
|------------------------------------------------------------------------------------------------------------------------------------------------------------------------------------------------------------------------------------------------------------------------------|-------------------------------------------------------------------------------------------------------------------------------------------------------------------------------------------------------------------------------------------------------------------------------------------------------------------------------------------------------------------------------|---------------------------------------------------------------------------------------------------------------------------------------------------------------------------|
| <p>skilled birth attendant at delivery in South West Shoa Zone, Ethiopia: A cross sectional study. <i>Reprod Health.</i> 2015;12(1):1-12. doi:10.1186/s12978-015-0067-y.</p>                                                                                                 | <ul style="list-style-type: none"> <li>• Identified a blood donor</li> <li>• Decided on the facility where the baby will be born</li> <li>• Identified a skilled birth attendant</li> </ul>                                                                                                                                                                                   |                                                                                                                                                                           |
| <p>Gebre M, Gebremariam A, Abebe TA. Birth Preparedness and Complication Readiness among Pregnant Women in Duguna Fango District, Wolayta Zone, Ethiopia. <i>PLoS One.</i> 2015;10(9):e0137570. doi:10.1371/journal.pone.0137570.</p>                                        | <ul style="list-style-type: none"> <li>• Identified a trained birth attendant</li> <li>• Identified a health facility for emergency;</li> <li>• Identified mode of transport for</li> <li>• Delivery and/or for obstetric emergency</li> <li>• Saved money</li> <li>• Identified blood donor</li> </ul>                                                                       | <ul style="list-style-type: none"> <li>• Reported ≥3 of 5 items (60%)</li> </ul>                                                                                          |
| <p>Belda SS, Gebremariam MB. Birth preparedness , complication readiness and other determinants of place of delivery among mothers in Bale Zone , Goba District , South East Ethiopia. <i>BMC Pregnancy Childbirth.</i> 2016:1-12. doi:10.1186/s12884-016-0837-8.</p>        | <ul style="list-style-type: none"> <li>• Identified place of delivery</li> <li>• Identified skilled birth attendant</li> <li>• Saved money</li> <li>• Identified means of emergency</li> <li>• transport</li> <li>• Arranged a blood donor for emergency</li> <li>• Identified emergency signs</li> <li>• Identified health institution with 24 h EmOC</li> </ul>             | <ul style="list-style-type: none"> <li>• Not defined</li> </ul>                                                                                                           |
| <p>Bitew Y, Awoke W, Chekol S. Birth Preparedness and Complication Readiness Practice and Associated Factors among Pregnant Women, Northwest Ethiopia. <i>Int Sch Res Not.</i> 2016;2016:1-8. doi:10.1155/2016/8727365.</p>                                                  | <ul style="list-style-type: none"> <li>• Identify place of delivery</li> <li>• Saved money</li> <li>• Identified skilled provider</li> <li>• Aware of key danger signs and act on immediately,</li> <li>• Designated decision maker</li> <li>• Identified source of support in case of emergency</li> <li>• “Arranged transport, EMOC, blood donor, and emergency”</li> </ul> | <ul style="list-style-type: none"> <li>• Reported ≥3 of 7 items (43%)</li> </ul>                                                                                          |
| <p>Lakew Y, Tessema F, Hailu C. Birth Preparedness and Its Association with Skilled Birth Attendance and Postpartum Checkups among Mothers in Gibe Wereda, Hadiya Zone, South Ethiopia. <i>J Environ Public Health.</i> 2016;2016(1994):12-14. doi:10.1155/2016/6458283.</p> | <ul style="list-style-type: none"> <li>• Identified skilled attendant</li> <li>• Identified health institution for delivery and complication</li> <li>• Saved money</li> <li>• Arranged transportation</li> <li>• Identified blood donor</li> <li>• Arranged essentials (clean clothes,</li> </ul>                                                                            | <ul style="list-style-type: none"> <li>• Used principal components analysis (PCA) to develop a scale with three categories: poor, moderate, and well prepared.</li> </ul> |

|                                                                                                                                                                                                                                                                 |                                                                                                                                                                                                                                                                                                                                                                                |                                                                                  |
|-----------------------------------------------------------------------------------------------------------------------------------------------------------------------------------------------------------------------------------------------------------------|--------------------------------------------------------------------------------------------------------------------------------------------------------------------------------------------------------------------------------------------------------------------------------------------------------------------------------------------------------------------------------|----------------------------------------------------------------------------------|
|                                                                                                                                                                                                                                                                 | <ul style="list-style-type: none"> <li>delivery kit)</li> <li>• Arranged food</li> <li>• Made other arrangements</li> </ul>                                                                                                                                                                                                                                                    |                                                                                  |
| <p>Zepre K, Kaba M. Birth preparedness and complication readiness among rural women of reproductive age in Aabeshige district, Gguraghe zone, SNNPR, Ethiopia. <i>Int J Womens Health</i>. 2017;9:11-21. doi:10.2147/IJWH.S111769.</p>                          | <ul style="list-style-type: none"> <li>• Identified place of delivery</li> <li>• Identified skilled health care provider</li> <li>• Saved money</li> <li>• Identified transport ahead of emergency</li> <li>• Identified a blood donor</li> </ul>                                                                                                                              | <ul style="list-style-type: none"> <li>• Reported ≥3 of 5 items (60%)</li> </ul> |
| <p>Andarge E, Nigussie A, Wondafrash M. Factors associated with birth preparedness and complication readiness in Southern Ethiopia: a community based cross-sectional study. <i>BMC Pregnancy Childbirth</i>. 2017;17(1):412. doi:10.1186/s12884-017-1582-3</p> | <ul style="list-style-type: none"> <li>• Saved money (planned to)</li> <li>• Identified health facility (planned to) for delivery (health center/hospital)</li> <li>• Identified skilled provider at birth (planned to)</li> <li>• Identified a means of transport to place of childbirth or for the time of obstetric emergencies (planned to) ahead of childbirth</li> </ul> | <ul style="list-style-type: none"> <li>• Reported ≥3 of 4 items (75%)</li> </ul> |
